# Supplementary material
Source: publisher site journal article supplement (https://www.dovepress.com/article/387428)
Supplement: Supplementary file 1 [file get_supplementary_file.php]

# Supplementary information

## **Combined Anti-angiogenic and Anti-inflammatory Nanoformulation for Effective Treatment of Ocular Vascular Diseases**

Jianguo Sun<sup>1,\*</sup>, Huiling Nie<sup>2,\*</sup>, Panpan Pan<sup>3,\*</sup>, Qin Jiang<sup>2,\*</sup>, Chang Liu<sup>1</sup>,  
Min Wang<sup>1</sup>, Yonghui Deng<sup>3,4,#</sup>, Biao Yan<sup>1,#</sup>

<sup>1</sup> Eye Institute and Department of Ophthalmology, Eye & ENT Hospital, State Key Laboratory of Medical Neurobiology, Fudan University, Shanghai 200031, China

<sup>2</sup> The Affiliated Eye Hospital and The Fourth School of Clinical Medicine, Nanjing Medical University, Nanjing 210003, China

<sup>3</sup> Department of Chemistry, Fudan University, Shanghai 200433, China

<sup>4</sup> Department of Gastroenterology and Hepatology, Zhongshan Hospital, Institute of Biomedical Sciences, Fudan University, Shanghai 200032, China

\*These authors contributed equally to this work.

#Correspondence authors:

Yonghui Deng, Ph.D. E-mail: yhdeng@fudan.edu.cn

Biao Yan, Ph.D. E-mail: biao.yan@fdeent.org

## Preparation and characterization of hMSN nanoparticles

Three kinds of hMSNs with the rambutan-like rough surfaces and the hollow cavities interconnected with a plenty of mesoporous (A7, A12, and A16) were synthesized at 0.7 vol%, 1.2 vol%, and 1.6 vol % TEOS volume fraction from. The morphology of hMSNs had the discrete spheres (Fig. S1a). The average diameters of hMSNs were  $252 \pm 11$  nm (A7),  $254 \pm 13$  nm (A12), and  $250 \pm 10$  nm (A16). Notably, hMSN-A16 had the greatest surface roughness (Fig. S1b). Nitrogen adsorption-desorption measurement revealed that compared with hMSN-A7 or A12, hMSN-A16 had larger pore volume, smaller pore size, and greater specific surface area (Fig. 1c)

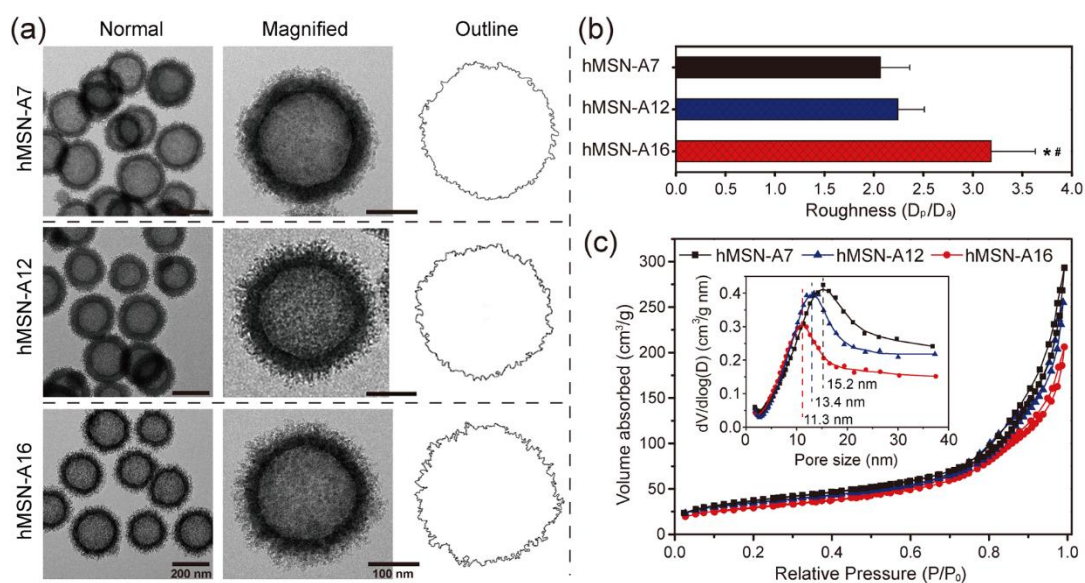

**Figure S1: Characterization of hMSN nanoparticles**

(a) TEM images, the magnified nanoparticle images, and the outlines of hMSN-A7, A12, and A16. (b) Surface roughness of hMSN-A7, A12, and A16. (c) Nitrogen adsorption-desorption isotherms of hMSN-A7, A12, and A16. The adsorbed volume against relative pressure plot was used to calculate the specific surface area in the relative pressure ( $P/P_0$ ) ranging from 0.04 to 0.1 by BET model, the pore size distribution and pore volume by BJH model, and the total pore volumes ( $V_t$ ) based on the adsorbed  $N_2$  amount at the  $P/P_0$  of 0.995. The pore size against  $dV/d\log(D)$  plot

was used to determine the pore size distribution. \* $P < 0.05$  vs. hMSN-A7; # $P < 0.05$  vs. hMSN-A12.

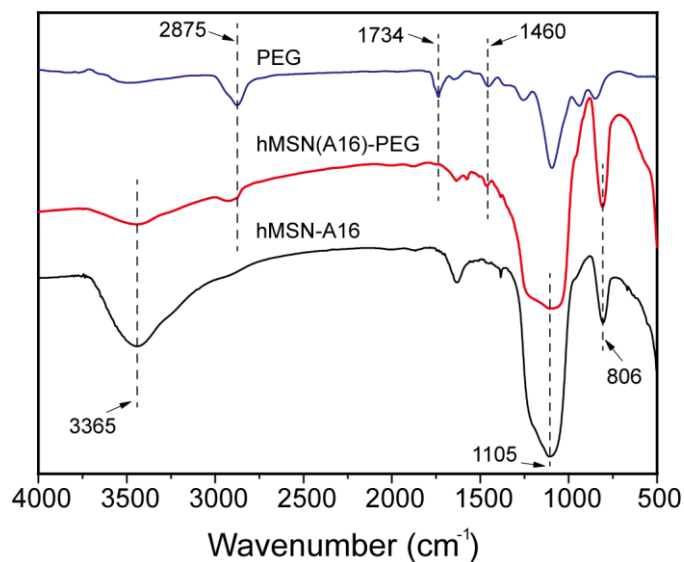

**Figure S2: FTIR spectra of hMSN, hMSN(SM) and PEG**

The characteristic peaks: 806  $\text{cm}^{-1}$  ( $\nu$  (Si-O)), a broad band at 1050-1200  $\text{cm}^{-1}$  with the highest point at 1105  $\text{cm}^{-1}$  ( $\delta$  (Si-O-Si)), 1734  $\text{cm}^{-1}$  ( $\delta$  (C=O)), and a broad band at 3000-4000  $\text{cm}^{-1}$  with the highest point at 3365  $\text{cm}^{-1}$  ( $\nu$  (OH)).

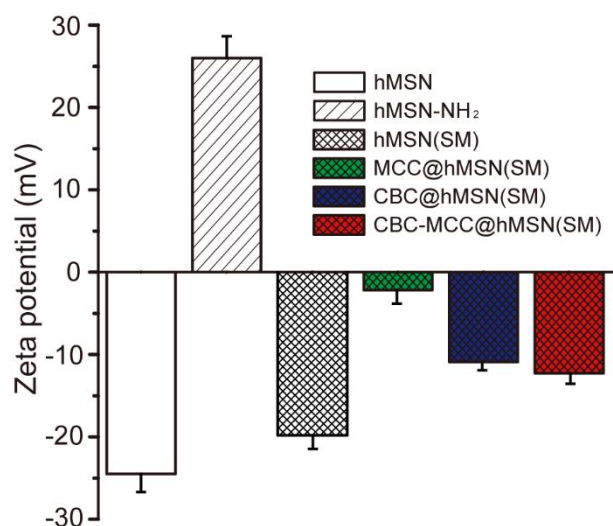

**Figure S3: Zeta potentials of hMSN, hMSN-NH<sub>2</sub>, hMSN(SM), MCC@hMSN(SM), CBC@hMSN(SM) and CBC-MCC@hMSN(SM) complex formulations**

#### Detection of MCC950 amount

The amount of MCC950 was detected by LC-MS/MS method using a AB SCIEX Triple TOF 5600 system equipped with a Waters Atlantis T3 column (2.1 × 50 mm, 5 μm). The mobile phase was used as following: solvent A = 0.1% formic acid/water, solvent B = 0.1% formic acid/acetonitrile. A binary gradient solvent was used with the B being 2% in 0-1 min, 40% in 1-15 min, 80% in 15-21 min, 98% in 21-23 min, 2% in 23-24 min, and washed in 24-32 min. The flow rate was 0.18 mL/min and data were acquired from m/z 70-600 in positive and negative scan mode (ACS Med Chem Lett, 2016, 7: 1034-1038).

#### Detection of CBC amount

The amounts of CBC in cell samples or ocular tissues were detected by ELISA assays. The capture antibody was the goat anti-human IgG-Fc (2.5 mg/mL; Bethyl, Montgomery, TX) and the detection antibody was the goat anti-human VEGFR2 conjugated with biotin (100 ng/mL; R&D). After incubation with streptavidin-conjugated horseradish peroxidase (HRP, R&D), the tetramethylbenzidine (TMB) substrate was added. The reaction was stopped using the dilute sulfuric acid. The optical density was detected using a microplate reader at 450 nm (J Ophthalmol, 2020, 2020: 2674780).
